# Supplementary material
Source: PubMed Central journal article supplement (PMC5465934)
Supplement: pnas.1703415114.sapp.pdf [file pnas.1703415114.sapp.pdf]

## SI Appendix

Wang, Yin et al.

**Strain and Plasmid Construction.** All strains are derivatives of a laboratory stock of *E. coli* K-12 MG1655 and are listed in SI Dataset S1. Deletion and tagged strains were generated by  $\lambda$ -Red-mediated recombineering (1-3) using NM400 and the oligonucleotides listed in SI Dataset S3. The chromosomal  $P_{lac}$ -5'UTR<sub>*mgtA*</sub>-*lacZ* fusion carrying the first 126 nt of the *mgtA* mRNA fused to the seventh codon of the *lacZ* coding sequence in PM1205 (4), was created using a  $P_{lac}$ -*mntP* 5'UTR-*lacZ* (5) strain and MG1655 as templates for overlapping PCR. The PCR product was integrated into the chromosome of PM1205 strain replacing the  $P_{BAD}$  promoter. Mutations and tags were moved between strains linked to antibiotic markers by P1 transduction. When necessary, kanamycin resistance cassettes were excised from the chromosome by FLP-mediated recombination (6). All mutations and fusions were confirmed by sequencing.

**Growth Conditions.** Cells were standardly grown overnight in LB medium (10 g of tryptone, 5 g of yeast extract, 10 g of NaCl per liter). All cultures were maintained at 37°C. The effects of high and low Mg<sup>2+</sup> levels were assayed in N-minimal medium (pH 7.4) (7) containing 0.1% casamino acids and 0.4% glycerol with indicated concentrations of MgSO<sub>4</sub>. Antibiotics were used at the following concentrations: kanamycin, 30  $\mu$ g/mL; chloramphenicol, 25  $\mu$ g/mL; ampicillin, 100  $\mu$ g/mL; tetracycline, 12.5  $\mu$ g/mL.

**Northern Analysis.** Cells (5 mL) were collected by centrifugation and flash frozen in liquid nitrogen. Subsequently, cell pellets were rapidly thawed at 37°C, resuspended in 100  $\mu$ L of 10

mM TE, pH 8.0 containing 30 mg/mL lysozyme and placed at 37°C for 10 min. After two more cycles of flash freezing in liquid nitrogen and thawing at 37°C, 1 mL of Trizol reagent (Ambion) was added to each sample, and cells were further lysed by repetitive pipetting and then incubated at room temperature for 5 min. After the addition of 0.2 mL of chloroform and further mixing, the top 0.6 mL of the aqueous phase was transferred to a new tube, and extracted once more with Trizol-chloroform. Total RNA was precipitated with 0.5 mL of isopropyl alcohol and washed with 75% ethanol before resuspension in 25  $\mu$ L of deionized water. For Northern blot analysis, 20  $\mu$ g of total RNA was separated on an 8% denaturing urea PAGE gel at 300 V for 1.5 h. The RNA was then transferred to Zeta-probe nylon membranes (BioRad) by electro-blotting for 18 h at 20 V at 4°C. Membranes were UV cross-linked and then incubated in hybridization buffer for 5 h at 45°C prior to the addition of a P<sup>32</sup>-labeled oligonucleotide probe. Blots were incubated overnight and then washed 5X in SSC buffer (Corning) and exposed to X-ray film.

**Immunoblot Analysis.** Cells were mixed with SDS loading buffer [50 mM Tris 6.8, 2% (w/v) sodium dodecyl sulfate (SDS), 0.1% (w/v) bromophenol blue, 10% (v/v) glycerol, 100 mM dithiothreitol (DTT)] and then subjected to SDS/PAGE on 10–20% Tris-glycine or Any kD Mini-PROTEAN TGX gels (BioRad) and electro-blotted to a 0.2  $\mu$ m pore size nitrocellulose membrane (Novex). Membranes were blocked by incubation in phosphate buffered saline with Tween 20 (PBS-T) containing 5% (wt/vol) milk. To detect SPA-tagged or FLAG-tagged MgtS, membranes were incubated with a 1:1,000 dilution of monoclonal  $\alpha$ -FLAG M2-horseradish peroxidase (HRP) antibody (Sigma) for ~1 h. To detect His<sub>6</sub>-tagged proteins, the membranes were incubated with a 1:2,000 dilution of Peta His HRP conjugate (Qiagen) for 2 h. To detect MgtA-HA, the membranes were incubated with 1:2000 Anti-HA tag antibody (CHIP grade,

Abcam) for 4 h, and then incubated with a 1:5,000 dilution of Amersham ECL Rabbit IgG, HRP-linked whole Ab from donkey (GE Health). SuperSignal West Pico Chemiluminescent Substrate (Pierce) was used for visualization of all the aforementioned HRP-conjugated antibodies.

**$\beta$ -galactosidase Assays.** Overnight cultures were diluted 1:100 into N medium with 500  $\mu$ M  $Mg^{2+}$  and grown to  $OD_{600} \sim 0.4-0.5$ . Two aliquots (3 mL) of cells from each culture were collected and then washed 2X in either N medium with 500  $\mu$ M  $Mg^{2+}$  or without added  $Mg^{2+}$ . After the addition of IPTG (1 mM) and arabinose (0.2%) for pBAD24-containing strains, cells were grown 30 min, and then  $\beta$ -galactosidase activity was assayed for 100  $\mu$ L as described (8).

**FLAG-tagged Protein Purification.** Overnight cultures were diluted 1:100 into 1 L of N medium with 15  $\mu$ M  $Mg^{2+}$  and grown to  $OD_{600} \sim 0.4-0.6$ . After arabinose (0.2%) was added to induce MgtS expression, cells were grown for another 4 h. Cells were collected, washed in 20 mL of buffer containing 10 mM Tris (pH 7.5) and 20% glycerol, collected a second time ( $3,700 \times g$ , 20 min) and resuspended in Basal buffer [10 mM Tris (pH 7.5), 100 mM NaCl, 10% glycerol] containing Protease inhibitor cocktail (Roche) and 500  $\mu$ M  $MgSO_4$ . The volume was adjusted with Basal buffer so that the  $OD_{600}$  of the sample was 50. The cells were lysed using a microfluidizer processor (Microfluidics) at 30,000 psi. The lysed cells were incubated with 50 mM dodecyl  $\beta$ -D-maltoside (DDM) in 4°C for 2.5 hours, and then the cell debris was removed by centrifugation ( $20,000 \times g$ , 20 min). The cleared lysate was incubated with 300  $\mu$ L of  $\alpha$ -FLAG M2-agarose beads from mouse (Sigma) for 6 h at 4°C. The lysate and beads were applied to a Bio-Spin disposable chromatography column (Bio-Rad Laboratories) and allowed to drain by gravity. The columns were washed 3X with 10 mL of Basal buffer supplemented with 2 mM

DDM. The proteins were eluted with 1 mL Acidic Elution buffer (100 mM Glycine pH 2.3, 100 mM NaCl, 0.1% Triton-X). Eluate (1 mL) was mixed with 250  $\mu$ L trichloroacetic acid (TCA) and incubated on ice for 1 h. The protein was pelleted by centrifugation at  $20,000 \times g$  for 30 min at  $4^{\circ}\text{C}$ . The pellet was washed 3X with 300  $\mu$ L of cold acetone ( $20,080 \times g$ ,  $4^{\circ}\text{C}$ , 10 min) and dried in a vacuum evaporator or heat block at  $95^{\circ}\text{C}$  for less than 5 min. Subsequently, 50  $\mu$ L of SDS loading buffer was added to each pellet. The samples were heated at  $95^{\circ}\text{C}$  for 15 min, and aliquots were subjected to SDS/PAGE on Any kD Mini-PROTEAN TGX gel. Protein were visualized with Coomassie blue staining. Bands of interest were excised from the gel and analyzed by liquid chromatography-tandem mass spectrometry (LC-MS/MS).

**His<sub>6</sub>-tagged Protein Purification.** Overnight cultures of strains overexpressing either MgtS-GG-FLAG or MgtS-D30A-GG-FLAG were diluted 1:100 into LB medium. At  $\text{OD}_{600} \sim 0.4\text{--}0.6$ , arabinose (0.2%) was added and cells were grown for another 1 h. Overnight cultures of strains overexpressing either MgtA-His<sub>6</sub> or AcrB-His<sub>6</sub> were diluted 1:100 into 1 L of N medium supplemented with 500  $\mu$ M MgSO<sub>4</sub>. At  $\text{OD}_{600} \sim 0.4\text{--}0.6$ , cells were collected, washed 2X in N medium without added Mg<sup>2+</sup>, resuspended in N medium without added Mg<sup>2+</sup> with arabinose (0.2%) and grown for another 2 h. Cells from each culture collected by centrifugation ( $4,650 \times g$ , 20 min) were washed in 20 mL of buffer containing 10 mM Tris (pH 7.5) and 20% glycerol, collected a second time ( $3,700 \times g$ , 20 min) and resuspended in Basal buffer containing Protease Inhibitor Cocktail (Roche) such that the  $\text{OD}_{600}$  of the sample was 50. Cells from the FLAG-tagged protein cultures were mixed with the His<sub>6</sub>-tagged protein cultures at a 3:1 ratio. To ensure thorough mixing, cells were shaken gently at  $4^{\circ}\text{C}$  for 15 min. The cells were then homogenized as for the FLAG-tagged protein purification and then incubated with 50 mM DDM in  $4^{\circ}\text{C}$  for 3

h. The insoluble cellular debris was removed by centrifugation ( $20,000 \times g$ , 20 min), and the supernatant was applied to 600  $\mu\text{L}$   $\text{Ni}^{2+}$ -NTA agarose resin (Qiagen) in a Bio-Spin disposable chromatography column (Bio-Rad Laboratories) and allowed to drain by gravity. The columns were washed with 25 mL of Basal buffer supplemented with 2 mM DDM and 20 mM imidazole, and washed beads (50  $\mu\text{L}$ ) were mixed with 2X SDS loading buffer (50  $\mu\text{L}$ ) and heated at  $95^\circ\text{C}$  for 10 min. Eluted samples (15  $\mu\text{L}$ ) were analyzed on immunoblots using anti-His or M2 anti-FLAG antibodies.

**HA-tagged Protein Purification.** Overnight cultures were diluted 1:100 into 1 L of N medium supplemented with 500  $\mu\text{M}$   $\text{MgSO}_4$ . At  $\text{OD}_{600} \sim 0.4\text{--}0.6$ , cells were collected, washed 2X in N medium without added  $\text{Mg}^{2+}$ , resuspended in N medium without added  $\text{Mg}^{2+}$  and grown for another 2.5 h. A small aliquot (100  $\mu\text{L}$ ) of cells was taken before lysis for immunoblot analysis (7.5  $\mu\text{L}$  loaded). Cells from each culture were collected by centrifugation as for the His-tagged protein purification. The cells were homogenized as for the FLAG-tagged protein purification and then incubated with 50 mM DDM in  $4^\circ\text{C}$  for 3 h. The insoluble cellular debris was removed by centrifugation ( $20,000 \times g$ , 20 min), and the supernatant was applied to 300  $\mu\text{L}$  Pierce Anti-HA agarose (Thermo Scientific) in a Bio-Spin disposable chromatography column and allowed to drain by gravity. The columns were washed with 25 mL of Basal buffer supplemented with 2 mM DDM. Washed beads (50  $\mu\text{L}$ ) were mixed with 50  $\mu\text{L}$  of 2X SDS loading buffer and heated at  $95^\circ\text{C}$  for 10 min. Samples (15  $\mu\text{L}$ ) eluted from beads were analyzed on immunoblots using anti-His or M2 anti-FLAG antibodies.

1. Datsenko KA, Wanner BL (2000) One-step inactivation of chromosomal genes in *Escherichia coli* K-12 using PCR products. *Proc. Natl. Acad. Sci. USA* 97:6640-6645.
2. Yu D, *et al.* (2000) An efficient recombination system for chromosome engineering in *Escherichia coli*. *Proc. Natl. Acad. Sci. USA* 97:5978-5983.
3. Court DL, *et al.* (2003) Mini-1: a tractable system for chromosome and BAC engineering. *Gene* 315:63-69.
4. Mandin P, Gottesman S (2009) A genetic approach for finding small RNAs regulators of genes of interest identifies RybC as regulating the DpiA/DpiB two-component system. *Mol. Microbiol.* 72:551-565.
5. Dambach M, *et al.* (2015) The ubiquitous *yybP-ykoY* riboswitch is a manganese-responsive regulatory element. *Mol. Cell* 57:1099-1109.
6. Cherepanov PP, Wackernagel W (1995) Gene disruption in *Escherichia coli*: TcR and KmR cassettes with the option of Flp-catalyzed excision of the antibiotic-resistance determinant. *Gene* 158:9-14.
7. Hmiel SP, Snively MD, Miller CG, Maguire ME (1986) Magnesium transport in *Salmonella typhimurium*: characterization of magnesium influx and cloning of a transport gene. *J. Bacteriol.* 168:1444-1450.
8. Miller JH (1992) *A Short Course in Bacterial Genetics: A Laboratory Manual and Handbook for Escherichia coli and Related Bacteria*. (Cold Spring Harbor Laboratory Press, Plainview, NY).

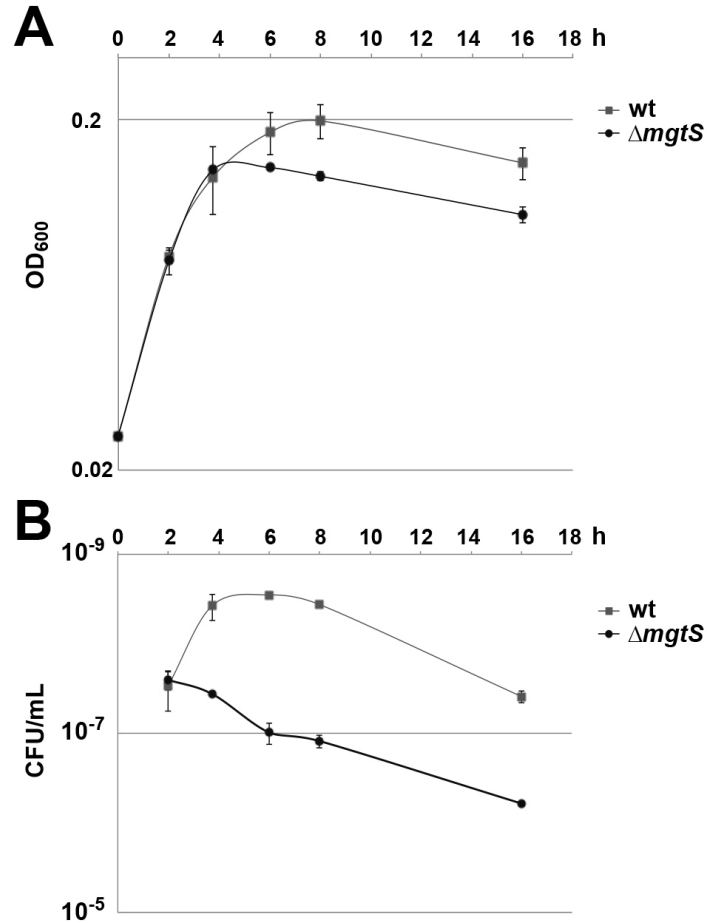

**Fig. S1.** Decrease in OD<sub>600</sub> correlates with decrease in number of colony forming units. Cells from overnight cultures of wild type (MG1655) and  $\Delta mgtS$  (GSO775) strains were washed 1X with Mg<sup>2+</sup> free N-minimal medium and diluted to an OD<sub>600</sub> = 0.025 in N-minimal medium containing 7.5  $\mu$ M Mg<sup>2+</sup>. (A) OD<sub>600</sub> of the cultures was measured and (B) aliquots were removed for CFU/mL enumeration at the indicated times. The average OD<sub>600</sub> and CFU/mL for three cultures are shown, and the error bars represent 1 SD.

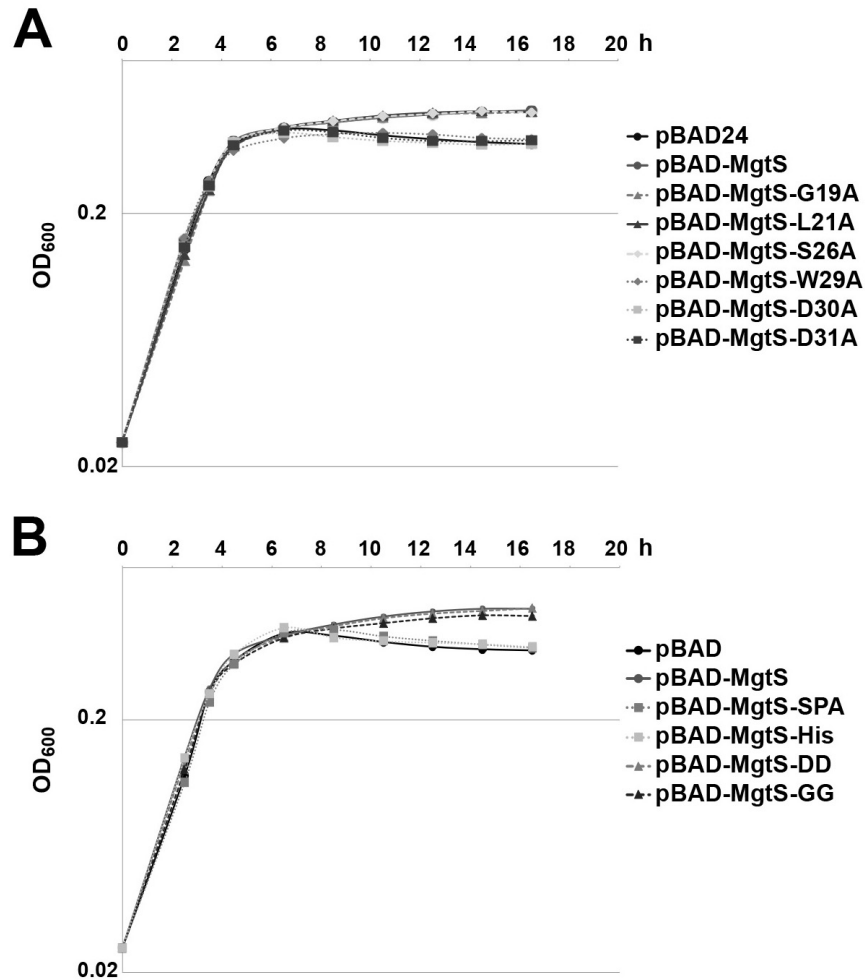

**Fig. S2.** Mutant derivatives of MgtS vary in ability to complement  $\Delta mgtS$ . (A) W29A, D30A and D31A derivatives of MgtS are unable to suppress growth defect of  $\Delta mgtA$  strain in low  $Mg^{2+}$ . Cells from overnight cultures of  $\Delta mgtS$  (GSO775) carrying either the pBAD24 vector, pBAD-MgtS or indicated mutants were washed 1X with  $Mg^{2+}$  free N-minimal medium and diluted to an  $OD_{600} = 0.025$  in N-minimal medium containing  $7.5 \mu M Mg^{2+}$ . (B) While SPA and His-tagged ( $Gly_6$ -His<sub>6</sub>) derivatives of MgtS are unable to suppress growth defect of  $\Delta mgtA$  strain in low  $Mg^{2+}$ , MgtS derivatives with DD or GG added to the C-terminus are functional. Cells from overnight cultures of  $\Delta mgtS$  (GSO775) carrying either the pBAD24 vector, pBAD-MgtS or



indicated tagged derivatives were washed 1X with  $\text{Mg}^{2+}$  free N-minimal medium and diluted to an  $\text{OD}_{600} = 0.025$  in N-minimal medium containing  $7.5 \mu\text{M Mg}^{2+}$ . For both (*A*) and (*B*), the  $\text{OD}_{600}$  of the cultures was measured at the indicated times. The average of two cultures is shown.

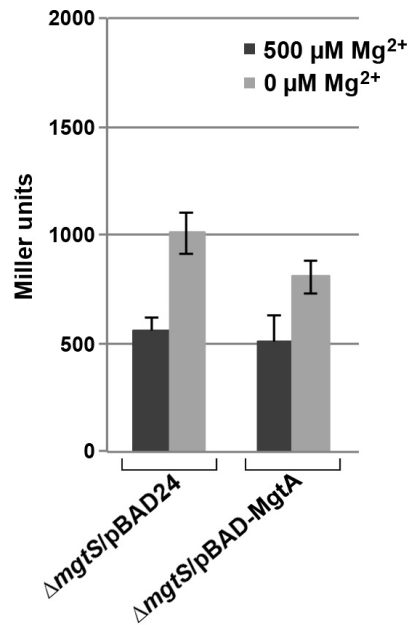

**Fig. S3.** MgtA overexpression can partially suppress  $\Delta\text{mgtS}$ . Cells from overnight cultures of  $\Delta\text{mgtS}$  (GSO775) cells carrying the chromosomal  $P_{lac}\text{-}5'\text{UTR}_{\text{mgtA}}\text{-lacZ}$  fusion and the indicated plasmids were diluted 1:100 into N medium with 500  $\mu\text{M Mg}^{2+}$ . Upon reaching  $\text{OD}_{600} \sim 0.4\text{-}0.6$ , cultures were split; one half was washed 2X with N medium with 500  $\mu\text{M Mg}^{2+}$  and the other half was washed 2X with N medium without added  $\text{Mg}^{2+}$ . After the addition of IPTG (1 mM final concentration) to induce the  $P_{lac}$  promoter, cells were allowed to grow 30 min whereupon cells were collected for  $\beta$ -galactosidase assays. The average of three independent assays is shown, and the error bars represent 1 SD.

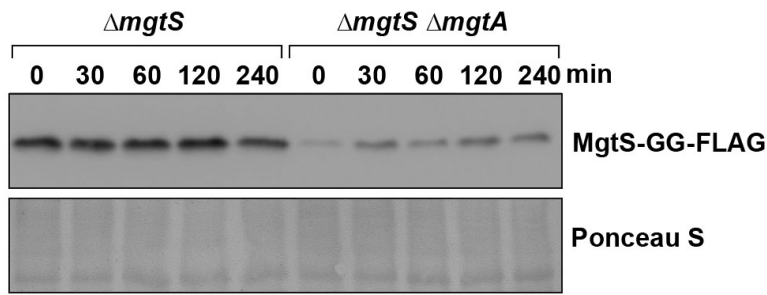

**Fig. S4.** MgtS is reciprocally stabilized by MgtA. Overnight cultures of  $\Delta mgtS$  (GSO775) and  $\Delta mgtS \Delta mgtA$  (GSO781) cells carrying pBAD24-MgtS-GG-FLAG were diluted 1:100 into N medium with 1 mM  $Mg^{2+}$ . Upon reaching  $OD_{600} \sim 0.4-0.6$ , the remaining cells were washed 2X with N medium without added  $Mg^{2+}$ , resuspended in the same volume of N medium without added  $Mg^{2+}$ , and arabinose (0.2%) was added to induce the  $P_{BAD}$  promoter. After 60 min in N medium with 0.2% arabinose but lacking  $Mg^{2+}$ , the cultures were washed 2X with N medium lacking  $Mg^{2+}$  without arabinose and then incubated in the same medium. Aliquots taken at the indicated time points after the wash were pelleted, resuspended to  $OD_{600} \sim 50$  in SDS loading buffer, and separated by SDS-PAGE for immunoblot analysis using anti-FLAG antibodies.
